# Supplementary material
Source: PubMed Central journal article supplement (PMC1964845)

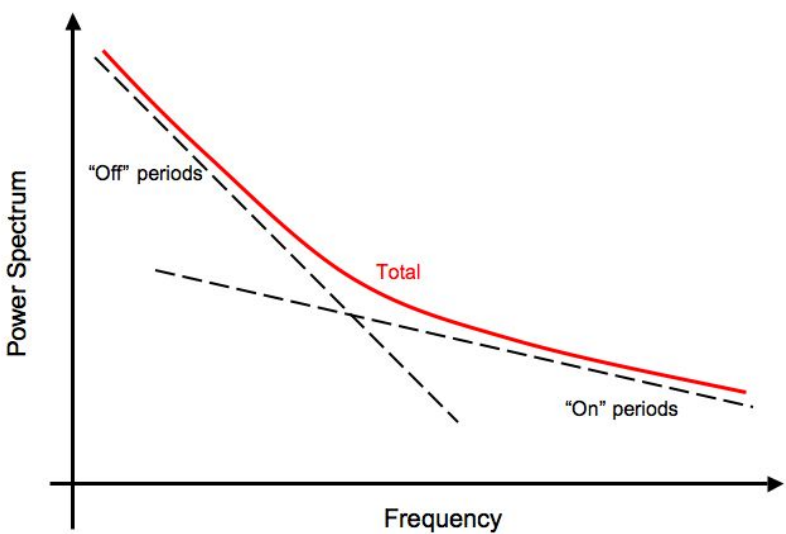

Supplement: pnas_0706164104_1.pdf [file pnas_0706164104_1.pdf]
